# Supplementary material for: The role of oral and pharyngeal motor exercises in post-stroke recovery: A scoping review
Source: PubMed Central journal article supplement (PMC10041576; doi:10.1177/02692155221141395), 2022-11-25
Supplement: sj-pdf-1-cre-10.1177_02692155221141395.pdf [file sj-pdf-1-cre-10.1177_02692155221141395.pdf]

## Supplementary File. 1 Example of a search strategy implemented for Ovid Medline

1. exp Cerebrovascular Disorders/,
2. stroke\*.tw,kf.,
3. exp stroke rehabilitation/,
4. 1 or 2 or 3,
5. exp myofunctional therapy/ or exp speech therapy/ or breathing exercises/ or exp exercise movement technique/,
6. ((Oral or oro\*) adj4 (motor or face or facial or pharyn\* or strength\*)).mp. and (exercise\* or train\* or intervention or rehab\* or stimulation or therap\*).tw,kf.
7. exp exercise therapy/,
8. 5 or 6 or 7,
9. exp Deglutition Disorders/ or exp eating/,
10. exp verbal behavior/ or exp speech/ or exp communication disorders/,
11. exp Muscle, Skeletal/,
12. exp sleep apnea syndromes/ or exp mouth breathing/ or exp snoring/,
13. (sleep apnea or snoring or sleep breathing disorder).tw,kf.,
14. (swallow\* or deglutition or dysphagia).tw,kf.,
15. (dysarthria or articulation or speech or phonation).tw,kf.,
16. (tongue or lip\* or face or mouth or palate or jaw or cheek\*).tw,kf.,
17. 9 or 10 or 11 or 12 or 13 or 14 or 15 or 16,
18. 4 and 8 and 17
